# Supplementary material for: NELFE-Dependent MYC Signature Identifies a Unique Cancer Subtype in Hepatocellular Carcinoma
Source: PubMed Central journal article supplement (PMC6399236; doi:10.1038/s41598-019-39727-9), 2019-03-04
Supplement: 41598_2019_39727_MOESM1_ESM.pdf [file 41598_2019_39727_MOESM1_ESM.pdf]

# **NELFE-Dependent MYC Signature Identifies a Unique Cancer Subtype in Hepatocellular Carcinoma**

Hien Dang<sup>1,4\*</sup>, Yotsawat Pomyen<sup>1,3</sup>, Sean P. Martin<sup>1</sup>, Dana A. Dominguez<sup>1</sup>, Sun Young Yim<sup>2</sup>, Ju-Seog Lee<sup>2</sup>, Anuradha Budhu<sup>1</sup>, Ashesh A. Shah<sup>5</sup>, Adam S. Bodzin<sup>5</sup>, and Xin Wei Wang<sup>1\*</sup>

<sup>1</sup>Laboratory of Human Carcinogenesis, Center for Cancer Research, National Cancer Institute, Bethesda, Maryland, United States

<sup>2</sup>Department of Systems Biology, Division of Cancer Medicine, UT MDACC, Houston, TX, United States

<sup>3</sup>Translational Research Unit, Chulabhorn Research Institute, Bangkok, 10210, Thailand

<sup>4</sup>Department of Surgery, Division of Surgical Research, Thomas Jefferson University, Philadelphia, PA, United States

<sup>5</sup>Department of Surgery, Division of Transplantation, Thomas Jefferson University, Philadelphia, PA, United States

\*Co-corresponding authors

Xin Wei Wang: [xw3u@nih.gov](mailto:xw3u@nih.gov)

Hien Dang: [hien.dang@jefferson.edu](mailto:hien.dang@jefferson.edu)

Supplemental Table 1. Demographic, clinical and laboratory characteristics of HCC patients in the LCI, TCGA-LIHC, and LEC cohorts.

| Cohort                        | LCI                  |                | TCGA-LIHC            |               | LEC                  |               | KOREAN               |               |  |
|-------------------------------|----------------------|----------------|----------------------|---------------|----------------------|---------------|----------------------|---------------|--|
| Clinical variable             | Non-NDMTs<br>(121)   | NDMTs<br>(120) | Non-NDMTs<br>(273)   | NDMTs<br>(91) | Non-NDMTs<br>(107)   | NDMTs<br>(32) | Non-NDMTs<br>(115)   | NDMTs<br>(43) |  |
|                               | p value <sup>a</sup> |                | p value <sup>a</sup> |               | p value <sup>a</sup> |               | p value <sup>a</sup> |               |  |
| <b>Demographics</b>           |                      |                |                      |               |                      |               |                      |               |  |
| <b>Sex</b>                    | 0.348                |                | <b>0.009</b>         |               | 0.489                |               | 0.518                |               |  |
| Male                          | 106 (87%)            | 102 (85%)      | 190 (70%)            | 48 (53%)      | 77 (72%)             | 25 (78%)      | 96 (83%)             | 34 (79%)      |  |
| Female                        | 13 (11%)             | 18 (15%)       | 75 (27%)             | 37 (41%)      | 30 (28%)             | 7 (22%)       | 19 (17%)             | 9 (21%)       |  |
| No. (%) missing data          | 2 (2%)               | 0 (0%)         | 8 (3%)               | 6 (6%)        | 0 (0%)               | 0 (0%)        | 0 (0%)               | 0 (0%)        |  |
| <b>Age</b>                    | 0.841                |                | 0.758                |               | <b>0.008</b>         |               | 0.862                |               |  |
| ≥50 yr                        | 53 (44%)             | 55 (46%)       | 219 (80%)            | 69 (76%)      | 77 (72%)             | 15 (47%)      | 84 (73%)             | 32 (74%)      |  |
| <50 yr                        | 66 (54%)             | 65 (54%)       | 46 (17%)             | 13 (14%)      | 30 (28%)             | 17 (53%)      | 31 (27%)             | 11 (26%)      |  |
| No. (%) missing data          | 3 (2%)               | 0 (0%)         | 8 (3%)               | 9 (10%)       | 0 (0%)               | 0 (0%)        | 0 (0%)               | 0 (0%)        |  |
| <b>Risk factors</b>           |                      |                |                      |               |                      |               |                      |               |  |
| <b>Cirrhosis</b>              | <b>0.03</b>          |                | 0.092                |               | 0.653                |               | 0.134                |               |  |
| Yes                           | 105 (87%)            | 115 (96%)      | 99 (36%)             | 9 (25%)       | 52 (49%)             | 17 (53%)      | 40 (35%)             | 2 (5%)        |  |
| No                            | 14 (11%)             | 5 (4%)         | 66 (24%)             | 27 (75%)      | 55 (51%)             | 15 (47%)      | 46 (40%)             | 0 (0%)        |  |
| No. (%) missing data          | 2 (2%)               | 0 (0%)         | 108 (40%)            | 0 (0%)        | 0 (0%)               | 0 (0%)        | 29 (25%)             | 41 (96%)      |  |
| <b>BMI</b>                    | 0.824                |                | 0.340                |               | N/A                  |               | N/A                  |               |  |
| Under weight, BMI <18.5       | 6 (5%)               | 4 (3%)         | 18 (7%)              | 2 (2%)        |                      |               |                      |               |  |
| Overweight/Obesity, BMI >24   | 49 (40%)             | 38 (32%)       | 140 (51%)            | 32 (35%)      |                      |               |                      |               |  |
| No. (%) missing data          | 66 (55%)             | 48 (65%)       | 115 (42%)            | 57 (63%)      |                      |               |                      |               |  |
| <b>HBV status</b>             | <b>0.008</b>         |                | N/A                  |               | N/A                  |               | N/A                  |               |  |
| CC                            | 93 (77%)             | 76 (63%)       |                      |               |                      |               |                      |               |  |
| AVR-CC                        | 22 (18%)             | 40 (33%)       |                      |               |                      |               |                      |               |  |
| No. (%) missing data          | 6 (5%)               | 4 (4%)         |                      |               |                      |               |                      |               |  |
| <b>Liver function factors</b> |                      |                |                      |               |                      |               |                      |               |  |
| <b>AFP</b>                    | <b>0.011</b>         |                | <b>p&lt;0.001</b>    |               | 0.200                |               | 0.169                |               |  |
| Normal, ≤400 ng/ml            | 72 (60%)             | 53 (44%)       | 169 (62%)            | 32 (35%)      | 60 (56%)             | 13 (40%)      | 89 (77%)             | 29 (67%)      |  |
| Abnormal, >400 ng/ml          | 45 (37%)             | 65 (54%)       | 40 (15%)             | 23 (25%)      | 40 (37%)             | 15 (47%)      | 25 (22%)             | 14 (33%)      |  |
| No. (%) missing data          | 4 (3%)               | 2 (2%)         | 64 (23%)             | 36 (40%)      | 7 (7%)               | 4 (13%)       | 1 (1%)               | 0 (0%)        |  |
| <b>ALT</b>                    | 0.165                |                | N/A                  |               | N/A                  |               | <b>0.020</b>         |               |  |
| ALT < 50                      | 75 (62%)             | 65 (54%)       |                      |               |                      |               | 89 (77%)             | 22 (51%)      |  |
| ALT > 50                      | 44 (36%)             | 55 (46%)       |                      |               |                      |               | 26 (23%)             | 16 (37%)      |  |
| No. (%) missing data          | 2 (2%)               | 0 (0%)         |                      |               |                      |               | 0 (0%)               | 5 (12%)       |  |
| <b>Tumor features</b>         |                      |                |                      |               |                      |               |                      |               |  |
| <b>Histological grade</b>     | 0.040                |                | <b>0.071</b>         |               | <b>0.442</b>         |               | N/A                  |               |  |
| I                             | 6 (5%)               | 5 (4%)         | 42 (15%)             | 7 (8%)        | 2 (2%)               | 0 (0%)        |                      |               |  |
| II-IV                         | 52 (43%)             | 51 (43%)       | 207 (76%)            | 74 (81%)      | 101 (94%)            | 30 (94%)      |                      |               |  |
| No. (%) missing data          | 63 (52%)             | 64 (53%)       | 24 (9%)              | 10 (11%)      | 4 (4%)               | 2 (6%)        |                      |               |  |
| <b>TNM staging</b>            | <b>0.034</b>         |                | <b>p&lt;0.001</b>    |               | 0.503                |               | <b>0.003</b>         |               |  |
| I                             | 58 (48%)             | 36 (30%)       | 147 (54%)            | 27 (32%)      | 4 (4%)               | 0 (0%)        | 82 (71%)             | 19 (44%)      |  |
| II+III                        | 37 (31%)             | 44 (37%)       | 115 (42%)            | 57 (68%)      | 62 (58%)             | 7 (22%)       | 33 (29%)             | 23 (54%)      |  |
| No. (%) missing data          | 26 (21%)             | 40 (33%)       | 11 (4%)              | 49 (54%)      | 41 (38%)             | 25 (78%)      | 0 (0%)               | 1 (2%)        |  |
| <b>Microvascular invasion</b> | <b>0.019</b>         |                | <b>0.021</b>         |               | 0.110                |               | <b>&lt;0.001</b>     |               |  |
| No                            | 83 (68%)             | 66 (55%)       | 160 (59%)            | 34 (37%)      | 21 (20%)             | 1 (3%)        | 98 (85%)             | 23 (53%)      |  |
| Yes                           | 36 (30%)             | 54 (45%)       | 73 (27%)             | 30 (33%)      | 43 (40%)             | 10 (31%)      | 16 (14%)             | 20 (47%)      |  |
| No. (%) missing data          | 2 (2%)               | 0 (0%)         | 40 (15%)             | 27 (30%)      | 43 (40%)             | 21 (66%)      | 1 (1%)               | 0 (0%)        |  |
| <b>Child-Pugh class</b>       | 0.727                |                | 0.659                |               | N/A                  |               | 0.878                |               |  |
| A                             | 39 (32%)             | 40 (33%)       | 166 (61%)            | 39 (43%)      |                      |               | 85 (74%)             | 2 (5%)        |  |
| B                             | 18 (15%)             | 16 (14%)       | 17 (6%)              | 3 (3%)        |                      |               | 1 (1%)               | 0 (0%)        |  |
| No. (%) missing data          | 64 (53%)             | 64 (53%)       | 90 (33%)             | 49 (54%)      |                      |               | 29 (25%)             | 41 (95%)      |  |
| <b>Tumor size</b>             | 0.517                |                | N/A                  |               | <b>0.039</b>         |               | 0.325                |               |  |
| >3 cm                         | 39 (32%)             | 35 (26%)       |                      |               | 83 (76%)             | 30 (94%)      | 33 (29%)             | 9 (21%)       |  |
| ≤3 cm                         | 79 (65%)             | 85 (71%)       |                      |               | 24 (22%)             | 2 (6%)        | 82 (71%)             | 34 (79%)      |  |
| No. (%) missing data          | 3 (3%)               | 0 (0%)         |                      |               | 0 (0%)               | 0 (0%)        | 0 (0%)               | 0 (0%)        |  |
| <b>Multinodular tumor</b>     | 0.093                |                | N/A                  |               | N/A                  |               | 0.748                |               |  |
| No                            | 98 (82%)             | 88 (73%)       |                      |               |                      |               | 68 (59%)             | 1 (2%)        |  |
| Yes                           | 21 (18%)             | 32 (27%)       |                      |               |                      |               | 7 (6%)               | 0 (0%)        |  |
| No. (%) missing data          | 3 (3%)               | 0 (0%)         |                      |               |                      |               | 40 (35%)             | 42 (98%)      |  |
| <b>BCLC staging</b>           | <b>0.008</b>         |                | 0.371                |               | NA                   |               | 0.658                |               |  |
| 0&A                           | 93 (76%)             | 77 (64%)       | 99 (37%)             | 0 (0%)        |                      |               | 56 (49%)             | 1 (2%)        |  |
| B&C                           | 18 (15%)             | 35 (29%)       | 102 (37%)            | 30 (33%)      |                      |               | 30 (26%)             | 1 (2%)        |  |
| No. (%) missing data          | 10 (9%)              | 8 (7%)         | 72 (26%)             | 61 (67%)      |                      |               | 29 (25%)             | 41 (96%)      |  |
| <b>Recurrent Metastasis</b>   | 0.827                |                | N/A                  |               | N/A                  |               | NA                   |               |  |
| No                            | 76 (63%)             | 75 (63%)       |                      |               |                      |               |                      |               |  |
| Yes                           | 43 (35%)             | 45 (37%)       |                      |               |                      |               |                      |               |  |
| No. (%) missing data          | 2 (2%)               | 0 (0%)         |                      |               |                      |               |                      |               |  |

Abbreviations: NA: Not available, HBV-hepatitis B virus, AVR-CC, active viral replication chronic carrier, CC, chronic carrier, HCV-hepatitis C virus, AFP-alpha-fetoprotein, ALT-alminotransferase, BCLC-Barcelona-Clinic liver cancer, and BMI-body mass index

<sup>a</sup>Chi-squared test

A

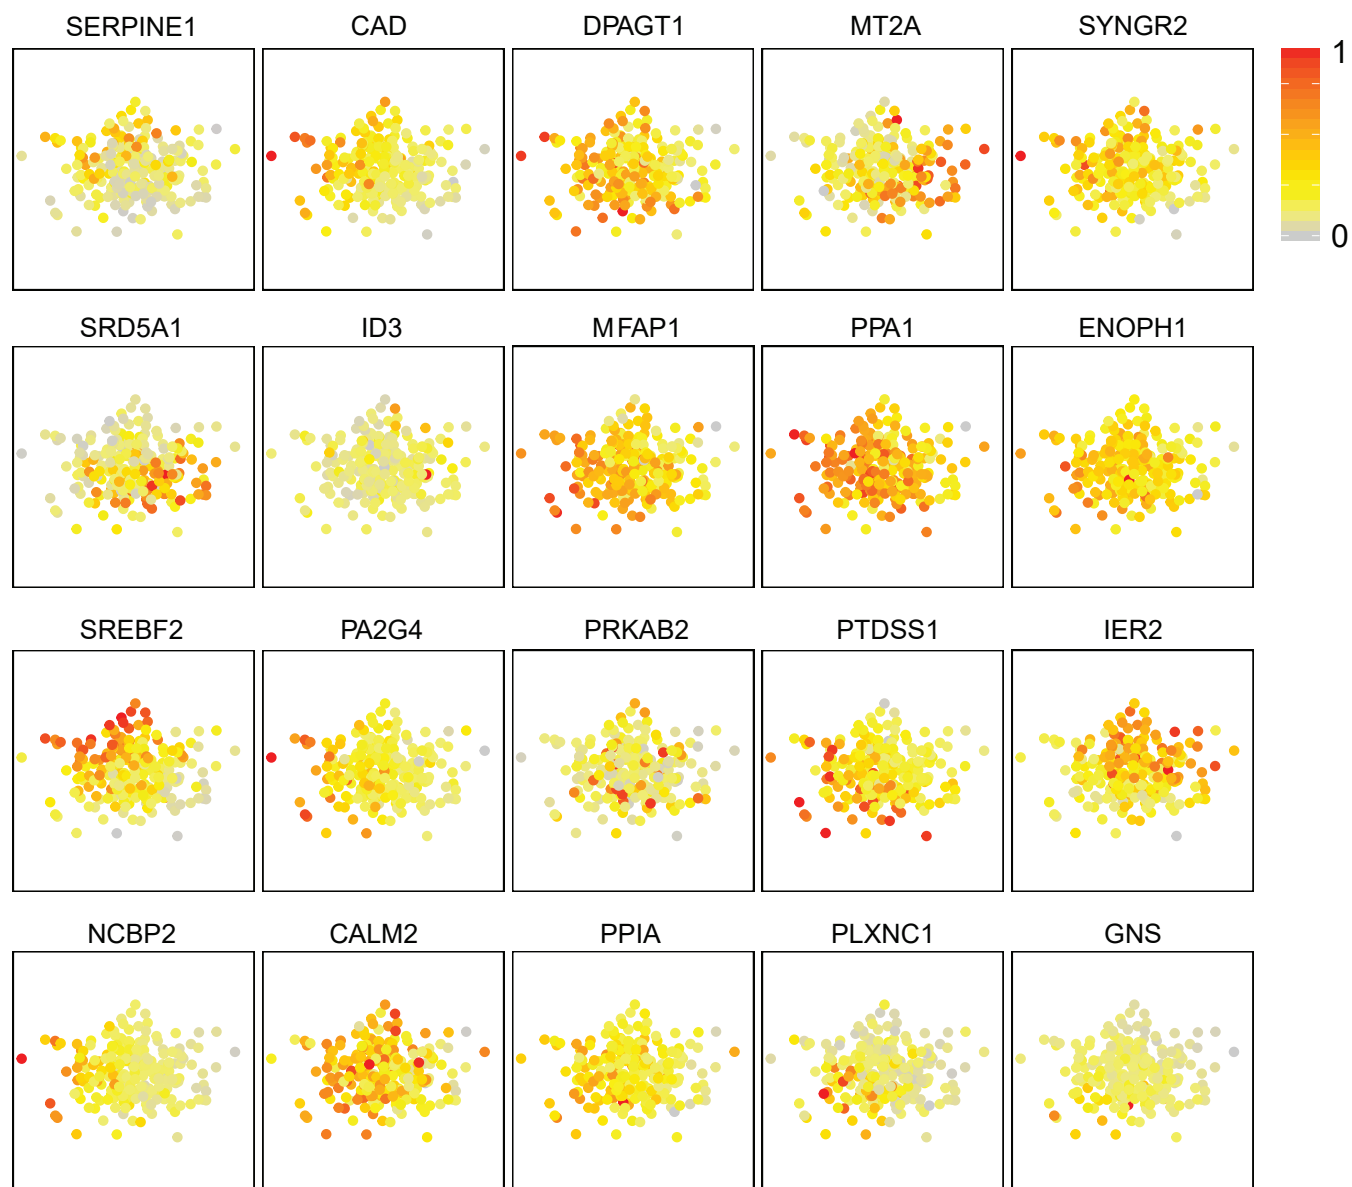

B

| Gene Id  | Weights ( $w_i$ ) |
|----------|-------------------|
| CAD      | 0.061746          |
| CALM2    | 0.042413          |
| DPAGT1   | 0.020167          |
| ENOPH1   | 0.048531          |
| GNS      | 0.031138          |
| ID3      | -0.019005         |
| IER2     | 0.049337          |
| MFAP1    | 0.022254          |
| MT2A     | -0.152551         |
| NCBP2    | 0.092179          |
| PA2G4    | 0.03582           |
| PLXNC1   | -0.015257         |
| PPA1     | 0.011134          |
| PPIA     | 0.0353            |
| PRKAB2   | -0.032401         |
| PTDSS1   | 0.040496          |
| SERPINE1 | 0.608612          |
| SRD5A1   | -0.19421          |
| SREBF2   | 0.097164          |
| SYNGR2   | 0.078953          |

**Supplementary Figure S1. NELFE dependent MYC target (NDMTs) genes.** (A) Gene expression of 20-NDMTs in the LCI cohort. (B) Regression coefficient (Weight) of each gene in the 20-NDMT signature used to calculate the index for each patient.

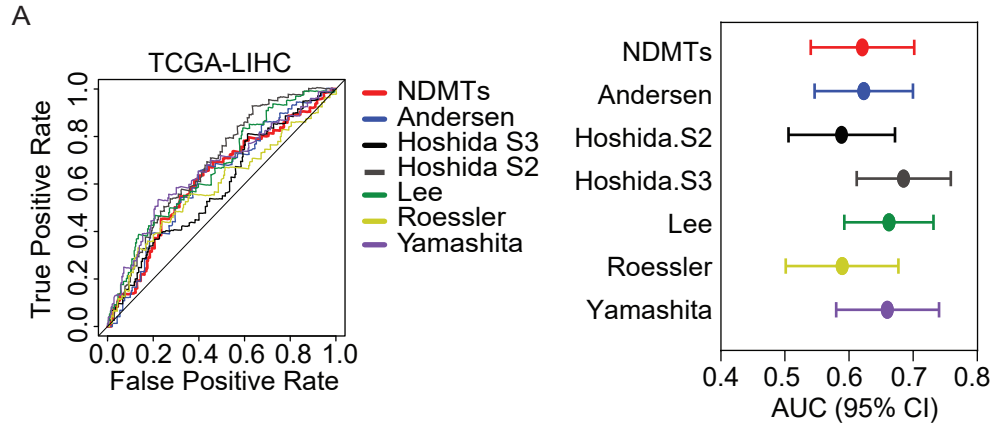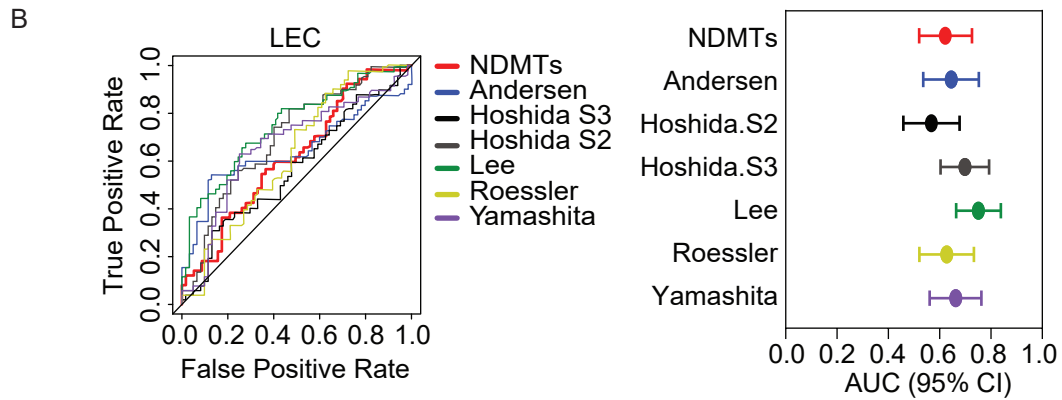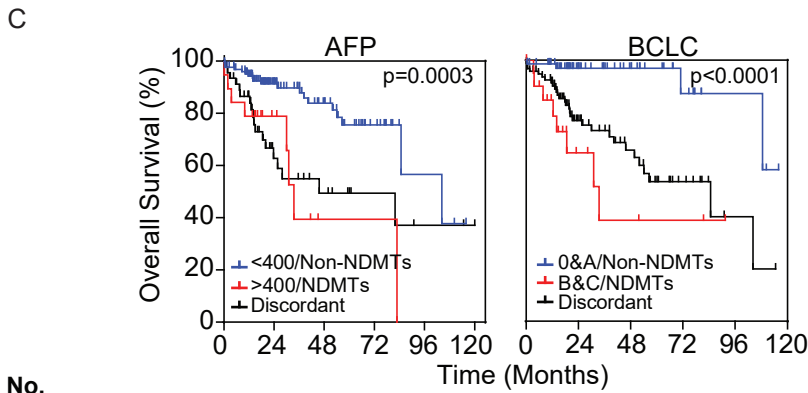

**No.**

|                |     |    |    |    |   |   |    |    |    |    |   |   |
|----------------|-----|----|----|----|---|---|----|----|----|----|---|---|
| <400/Non-NDMTs | 128 | 64 | 38 | 15 | 4 | 1 | 72 | 36 | 22 | 10 | 4 | 1 |
| >400/NDMTs     | 19  | 8  | 2  | 2  | 1 | 1 | 21 | 7  | 4  | 3  | 1 | 1 |
| Discordant     | 47  | 17 | 11 | 5  | 3 | 1 | 45 | 45 | 10 | 10 | 3 | 1 |

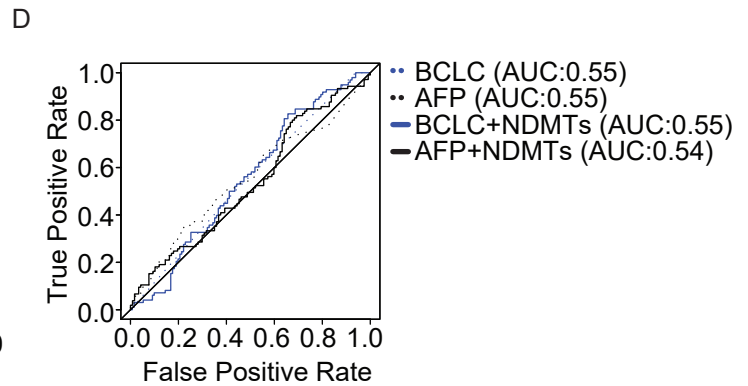

**Supplementary Figure S2. NDMT performance in HCC cohorts.** ROC curves for the (A) TCGA-LIHC and (B) LEC cohorts comparing the NDMT gene signature with Non-NDMTs. Forest plot represents AUC ( $\pm 95\%$  Confidence Interval). (C) Kaplan-Meier curve survival analyses of the LCI cohort stratified by AFP and BCLC staging with NDMTs or Non-NDMTs. P value is from Mantel-Cox log rank analyses. (D) Time-dependent ROC curve analyses of the TCGA-LIHC cohort at two years of Barcelona-Clinic Liver Cancer (BCLC), alpha-feto protein (AFP), BCLC +NDMTs, or AFP+NDMTs with associated area under the curve values (AUC).

A

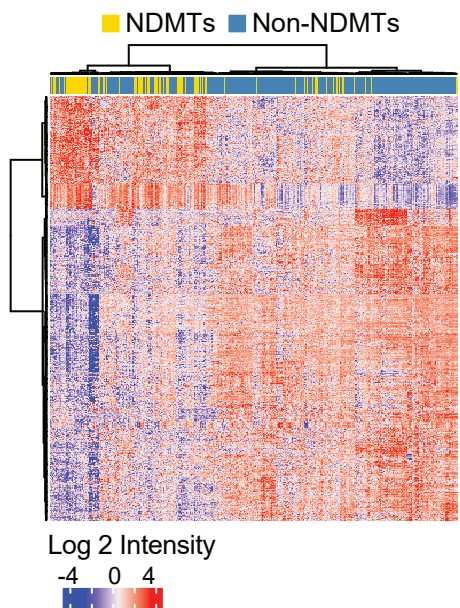

B

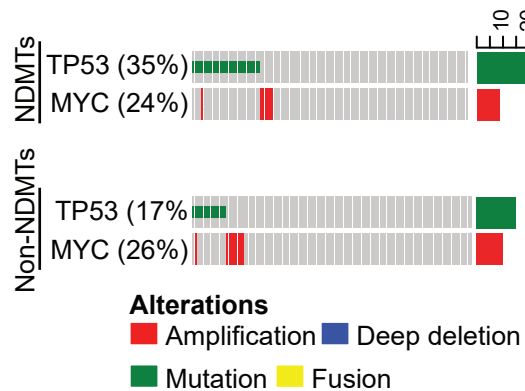

C

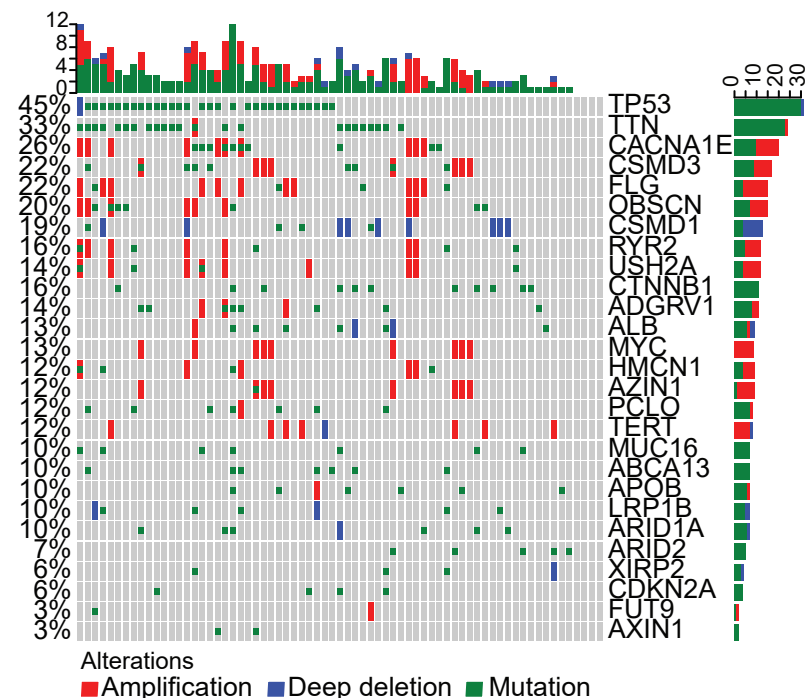

D

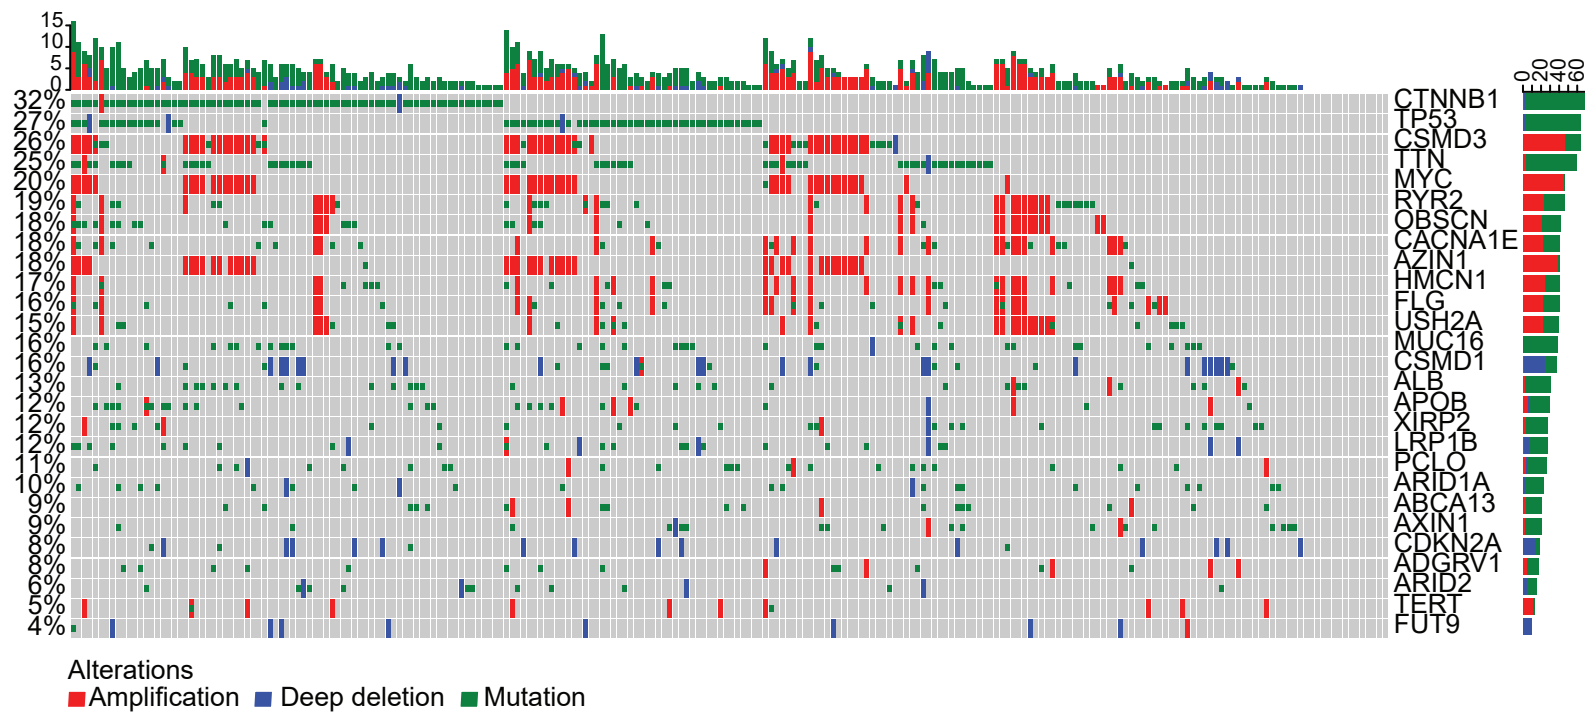

**Supplementary Figure S3. Genomic alterations of NDMTs.** (A) Heatmap of NELFE/MYC target genes differentially expressed between NDMTs and Non-NDMTs ( $p < 0.001$ ) in TCGA-LIHC cohort. Student's t-test was performed to identify DEGs following enrichment analysis for NELFE/MYC target genes. (B) TP53 mutation and MYC gene copy number alteration analyses in the LCI cohort. Mutation and gene copy number alterations of most frequently altered genes in NDMTs (C) and Non-NDMTs (D) TCGA-LIHC cohort.



A

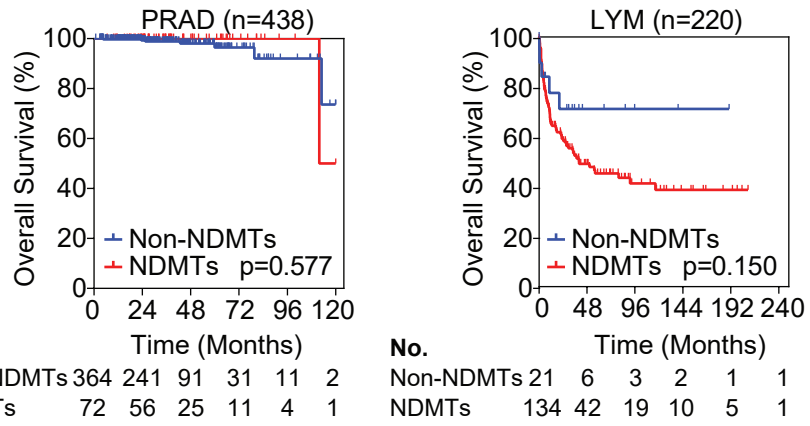

B

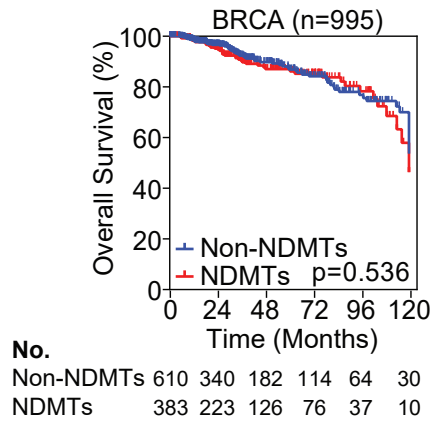

**Supplementary Figure S4. The NDMT subtype in other tumor types.** The NDMT gene signature identifies NDMTs in Burkitt's lymphoma (LYM) but not in prostate adenocarcinoma (PRAD). (B) Kaplan-Meier curve of TCGA breast cancer (BRCA) cohort.
